# Supplementary material
Source: ML conference proceedings conference paper supplement (https://proceedings.neurips.cc/paper_files/paper/2018/hash/7bccfde7714a1ebadf06c5f4cea752c1-Abstract.html)
Supplement: Supplementary file [file 7bccfde7714a1ebadf06c5f4cea752c1-Supplemental.zip]

# Supplemental Note for “Query Complexity of Bayesian Private Learning”

Kuang Xu  
kuangxu@stanford.edu

## A Figures

### Replicated Bisection (Phase 2)

---

```

 $l^* \leftarrow \text{the index of } \mathcal{I}^*, K \leftarrow \log\left(\frac{1}{L\epsilon}\right), D_0 \leftarrow \frac{1}{2L}$ 
for  $k := 0$  to  $K - 1$  do
  begin
    for  $l := 0$  to  $L - 1$  do
       $Q_{(k+1)L+l} \leftarrow (l-1)\frac{1}{L} + D_k$ 
    if  $R_{(k+1)L+l^*} = 0$  (i.e.,  $X^* > Q_{(k+1)L+l^*}$ ) then
       $D_{k+1} \leftarrow D_k + \frac{1}{L} \left(\frac{1}{2}\right)^k$ 
    else
       $D_{k+1} \leftarrow D_k - \frac{1}{L} \left(\frac{1}{2}\right)^k$ 
    end
  
```

---

Figure 1: Pseudo-code for Phase 2 of the Replicated Bisection strategy.  $D_k$  represents the distance from a query submitted in the  $k$ th round to the left end-point of its corresponding sub-interval.

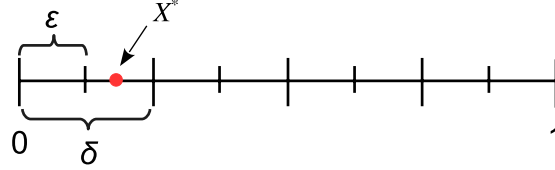

Figure 2: An example of the indices  $J(\cdot, X^*)$ . Here,  $\delta = 0.2$  and  $\epsilon = 0.1$ , and the target  $X^* = 0.15$ . The target thus belongs to the first sub-interval in a  $\delta$ -uniform partition, and the second sub-interval in an  $\epsilon$ -uniform partition. We have that  $J(\delta, X^*) = 1$  and  $J(\epsilon, X^*) = 2$ .

## B Proofs

### B.1 Proof of Proposition 4.1

Proof. Denote by  $\tilde{Q}_l$  the query submitted in the  $l$ th sub-interval during the last round of Phase 2 of the Replicated Bisection strategy. Note that since the positions of the queries relative to their respective sub-interval are identical in each round, we must have that

$$|\tilde{Q}_l - \tilde{Q}_{l'}| \geq \frac{1}{L}, \quad \forall l, l' \in \{1, \dots, L\}, l \neq l'. \quad (\text{B.1})$$

By the end of the second phase, the adversary knows that the target belongs to the sub-interval  $[\tilde{Q}_l - \epsilon, \tilde{Q}_l + \epsilon)$  for some  $l \in \{1, \dots, L\}$ , but not more than that. Formally, it is not difficult to show that, almost surely, the posterior density of  $X^*$  is

$$f_{X^*}(x|(Q_1, \dots, Q_n)) = \frac{1}{2L\epsilon}, \quad \forall x \in \cup_{l=1}^L [\tilde{Q}_l - \epsilon, \tilde{Q}_l + \epsilon), \quad (\text{B.2})$$

and  $f_{X^*}(x|(Q_1, \dots, Q_n)) = 0$  everywhere else. Recall that  $\epsilon < \delta$  and  $\delta < 1/L$  by assumption, we have that

$$\delta/2 < -\epsilon + 1/L, \quad (\text{B.3})$$

where the right-hand side corresponds to the distance between two adjacent intervals  $[\tilde{Q}_l - \epsilon, \tilde{Q} + \epsilon)$ . In light of Eq. (B.1), this implies that for any interval  $G \subset [0, 1)$  with length  $\delta$ ,

$$\mu^{\mathcal{L}} \left( G \cap \left( \bigcup_{l=1}^L [\tilde{Q}_l - \epsilon, \tilde{Q} + \epsilon) \right) \right) \leq 2\epsilon, \quad \text{almost surely,} \quad (\text{B.4})$$

where  $\mu^{\mathcal{L}}(\cdot)$  is the Lebesgue measure. Combining the above inequality with Eq. (B.2), we conclude that, for any adversary estimator  $\hat{X}^a$ , generated based on  $Q$ , we have

$$\mathbb{P} \left( |\hat{X}^a - X^*| \leq \delta/2 \mid (Q_1, \dots, Q_n) \right) \leq 1 - \frac{L-1}{L} = \frac{1}{L}, \quad \text{almost surely.} \quad (\text{B.5})$$

This shows that the Replicated Bisection strategy is  $(\delta, L)$ -private.  $\square$

## B.2 Proof of Lemma 5.4

**Proof.** Because the random seed,  $Y$ , is uniformly distributed over  $[0, 1)$ , the fact that  $\sum_{j=1}^{1/\delta} \delta \int_0^1 \xi_{i,y} dy \leq \nu$  follows directly from the learner strategy's being  $(\epsilon, \nu)$ -accurate:

$$\nu \geq \mathbb{P} \left( \hat{J} \neq J(\epsilon, X^*) \right) = \sum_{j=1}^{1/\delta} \int_0^1 \mathbb{P}(\mathcal{E}_{j,y}) \mathbb{P} \left( \hat{J} \neq J(\epsilon, X^*) \mid \mathcal{E}_{j,y} \right) dy = \sum_{j=1}^{1/\delta} \delta \int_0^1 \xi_{j,y} dy. \quad (\text{B.6})$$

We now show Eq. (5.6). Fix  $j \in \{1, \dots, 1/\delta\}$ , and  $y \in [0, 1)$ . We begin by making the simple observation that, conditional on  $\mathcal{E}_{j,y}$ , the subset of queries  $\mathcal{Q}^j$  together with their responses  $\mathcal{R}^j$  is sufficient for generating the learner's estimator,  $\hat{J}$ , because under this conditioning, any query that lies outside the sub-interval  $M_\delta(j)$  provides no additional information about the location of  $X^*$  than what is already known. Furthermore, since the random seed  $Y$  is fixed to  $y$ , the  $i$ th query,  $Q_i$ , is a deterministic function of the first  $i-1$  responses. We conclude that the set of responses  $\mathcal{R}^j$  alone is sufficient for generating  $\hat{J}$ .

For an event,  $\mathcal{E}$ , we will denote by  $H(A|B, \mathcal{E})$  the conditional entropy  $H(A|B)$  under the probability law  $\mathbb{P}(\cdot|\mathcal{E})$ :

$$H(A|B, \mathcal{E}) \triangleq - \sum_{a \in \mathcal{A}, b \in \mathcal{B}} \mathbb{P}(A = a, B = b \mid \mathcal{E}) \log \left( \mathbb{P}(A = a \mid B = b, \mathcal{E}) \right), \quad (\text{B.7})$$

where  $\mathcal{A}$  and  $\mathcal{B}$  are the alphabets for random variables  $A$  and  $B$ , respectively. Similarly, define

$$H(A \mid \mathcal{E}) \triangleq - \sum_{a \in \mathcal{A}} \mathbb{P}(A = a \mid \mathcal{E}) \log \left( \mathbb{P}(A = a \mid \mathcal{E}) \right). \quad (\text{B.8})$$

Let  $V \in \{0, 1\}^n$  be the vector representation of  $\mathcal{R}^j$ :

$$V_i = \text{the } i\text{th element of } \mathcal{R}^j, \quad i = 1, 2, \dots, |\mathcal{Q}^j|, \quad (\text{B.9})$$

and  $V_i = 1$  for all  $i = |\mathcal{Q}^j| + 1, \dots, n$ . The conditional entropy of  $V$  given  $\mathcal{E}_{j,y}$  satisfies:

$$\begin{aligned} H(V \mid \mathcal{E}_{j,y}) &= \sum_{k=1}^n H(V \mid \mathcal{E}_{j,y}, |\mathcal{Q}^j| = k) \mathbb{P}(|\mathcal{Q}^j| = k \mid \mathcal{E}_{j,y}) \\ &\leq \sum_{k=1}^n k \mathbb{P}(|\mathcal{Q}^j| = k \mid \mathcal{E}_{j,y}) \\ &= \mathbb{E}(|\mathcal{Q}^j| \mid \mathcal{E}_{j,y}), \end{aligned} \quad (\text{B.10})$$

where the inequality follows from the fact that, conditional on there being  $k$  responses in  $\mathcal{R}^j$ , we know that only the first  $k$  bits of  $V$  can be random, and hence the entropy of  $V$  cannot exceed  $k$ , which is the entropy of a length- $k$  vector where each entry is an independent Bernoulli random variable with mean  $1/2$ . We now invoke the following lemma by Robert Fano (cf. Section 2.1 of [3]).

**Lemma B.1** (Fano's Inequality). *Let  $A$  and  $B$  be two random variables, where  $A$  takes values in a finite set,  $\mathcal{A}$ . Let  $\hat{A}$  be a discrete random variable taking values in  $\mathcal{A}$ , such that  $\hat{A} = f(B, C)$ , where  $f$  is a deterministic function, and  $C$  a random variable independent from both  $A$  and  $B$ . Let  $p = \mathbb{P}(\hat{A} \neq A)$ . We have that*

$$H(A | B) \leq h(p) + p(\log |\mathcal{A}| - 1), \quad (\text{B.11})$$

where  $H(A | B)$  is the conditional entropy of  $A$  given  $B$ .

We apply Fano's inequality with the substitutions:  $A \leftarrow J(\epsilon, X^*)$ ,  $B \leftarrow V$ , and  $\hat{A} \leftarrow \hat{J}$ . Eq. (B.11) yields

$$H(J(\epsilon, X^*) | V, \mathcal{E}_{j,y}) \leq h(\xi_{j,y}) + \xi_{j,y} \log(\delta/\epsilon), \quad (\text{B.12})$$

where we have used the fact that, conditional on the event  $\mathcal{E}_{j,y}$ , the index  $J(\epsilon, X^*)$  can take at most  $\delta/\epsilon$  values. By the chain rule of conditional entropy, we have that

$$\begin{aligned} H(J(\epsilon, X^*) | V, \mathcal{E}_{j,y}) &= H(J(\epsilon, X^*), V | \mathcal{E}_{j,y}) - H(V | \mathcal{E}_{j,y}) \\ &\geq H(J(\epsilon, X^*) | \mathcal{E}_{j,y}) - H(V | \mathcal{E}_{j,y}) \\ &\stackrel{(a)}{=} \log(\delta/\epsilon) - H(V | \mathcal{E}_{j,y}) \\ &\stackrel{(b)}{\geq} \log(\delta/\epsilon) - \mathbb{E}(|\mathcal{Q}^j| | \mathcal{E}_{j,y}), \end{aligned} \quad (\text{B.13})$$

where step (a) follows from the fact that conditional on  $\mathcal{E}_{j,y}$ ,  $J(\epsilon, X^*)$  is uniformly distributed over  $\delta/\epsilon$  possible values, and step (b) follows from Eq. (B.10). Combining Eqs. (B.12) and (B.13) yields

$$\begin{aligned} \mathbb{E}(|\mathcal{Q}^j| | \mathcal{E}_{j,y}) &\geq \log(\delta/\epsilon) - H(J(\epsilon, X^*) | V, \mathcal{E}_{j,y}) \\ &\geq \log(\delta/\epsilon) - (h(\xi_{j,y}) + \xi_{j,y} \log(\delta/\epsilon)) \\ &= (1 - \xi_{j,y}) \log(\delta/\epsilon) - h(\xi_{j,y}). \end{aligned} \quad (\text{B.14})$$

This proves Lemma 5.4.  $\square$ .

### B.3 Proof of Proposition 5.6

**Proof.** Fix  $n \in \mathbb{N}$  and a continuous learner strategy,  $\phi \in \Phi_n$ , such that  $\phi$  is both  $\epsilon$ -accurate and  $(\delta, L)$ -private. Let  $\hat{X}$  the estimator of  $\phi$ . It suffices to show that there exists a function  $f : [0, 1) \rightarrow \mathcal{M}_{\beta\epsilon}$ , such that by using the same queries as  $\phi$ , and setting  $\hat{J} = f(\hat{X})$  we obtain a  $(\beta\epsilon, \beta^{-1})$ -accurate and  $(\delta, L)$ -private discrete learner strategy. Specifically, let  $\phi^D$  be the discrete learner strategy that submits the same queries as  $\phi$ , and produces the estimator

$$\hat{J} = J(\beta\epsilon, \hat{X}). \quad (\text{B.15})$$

That is,  $\hat{J}$  reports the index of the sub-interval in the  $\beta\epsilon$ -uniform partition that contains the continuous estimator,  $\hat{X}$ .

We first show that the induced discrete learner strategy is  $(\beta\epsilon, \beta^{-1})$ -private. The intuition is that if the target  $X^*$  is sufficiently far away from the edges of the sub-interval in the  $(\beta\epsilon)$ -uniform partition to which it belongs, then both  $X^*$  and  $\hat{X}$  will belong to the same sub-interval, and we will have  $J(\beta\epsilon, \hat{X}) = J(\beta\epsilon, X^*)$ . To make this precise, denote by  $\mathcal{G}_{\beta\epsilon}$  the set of end points of the sub-intervals in the  $(\beta\epsilon)$ -uniform partition:  $\mathcal{G}_{\beta\epsilon} \triangleq \{0, \beta\epsilon, 2\beta\epsilon, \dots, 1 - \beta\epsilon, 1\}$ . Let  $\mathcal{S}$  be the set of all points in  $[0, 1)$  whose distance to  $\mathcal{G}_{\beta\epsilon}$  is greater than  $\epsilon/2$ :

$$\mathcal{S} = \{x \in [0, 1) : \min_{y \in \mathcal{G}_{\beta\epsilon}} |x - y| > \epsilon/2\}. \quad (\text{B.16})$$

It is not difficult to show that the Lebesgue measure of  $\mathcal{S}$  satisfies  $\mu^{\mathcal{L}}(\mathcal{S}) = \epsilon/(\beta\epsilon) = \beta^{-1}$ , where  $\epsilon$  is the length of the intersection of  $\mathcal{S}$  with each of the  $(\beta\epsilon)^{-1}$  sub-intervals in a  $(\beta\epsilon)$ -partition. Since  $\phi$  is  $\epsilon$ -accurate, we know that  $\hat{X}$  must be no more than  $\epsilon/2$  away from  $X^*$ , and hence  $\hat{J} = J(\beta\epsilon, X^*)$  whenever  $X^* \notin \mathcal{S}$ , which implies

$$\mathbb{P}(\hat{J} \neq J(\beta\epsilon, X^*)) \leq \mathbb{P}(X^* \in \mathcal{S}) = \mu^{\mathcal{L}}(\mathcal{S}) = \beta^{-1}. \quad (\text{B.17})$$

This shows that  $\phi^D$  is  $(\beta\epsilon, \beta^{-1})$ -accurate.

We next show that  $\phi^D$  is also  $(\delta, L)$ -private. For the sake of contradiction, suppose otherwise. Then, there exists an estimator for the adversary,  $\hat{J}^a$ , such that

$$\mathbb{P}\left(\hat{J}^a = J(\delta, X^*)\right) > 1/L. \quad (\text{B.18})$$

We now use  $\hat{J}^a$  to construct a “good” adversary estimator for the continuous version: let  $\hat{X}^a$  be the mid point of the sub-interval  $M_\delta(\hat{J}^a)$ , where  $M_\delta(j)$  is the  $j$ th sub-interval in the  $\delta$ -uniform partition. If  $\hat{J}^a = J(\delta, X^*)$ , then  $M_\delta(j)$  contains  $X^*$ , and since the length of  $M_\delta(j)$  is  $\delta$ , we must have  $|\hat{X}^a - X^*| \leq \delta/2$ , and from Eq. (B.18), this implies

$$\mathbb{P}\left(|\hat{X}^a - X^*| \leq \delta/2\right) > 1/L. \quad (\text{B.19})$$

We therefore conclude that if an estimator satisfying Eq. (B.18) did exist, then the original continuous learner strategy,  $\phi$ , could not have been  $(\delta, \epsilon)$ -private, which leads to a contradiction. We have thus shown that  $\phi^D$  is  $(\beta\epsilon, \beta^{-1})$ -accurate and  $(\delta, L)$ -private. Because  $\phi^D$  uses the same sequence of queries as  $\phi$ , we conclude that  $N(\epsilon, \delta, L) \geq N^D(\beta\epsilon, \beta^{-1}, \delta, L)$ . This proves Proposition 5.6  $\square$
